# Supplementary material for: Brief Communication: Monitoring snow depth using small, cheap, and easy-to-deploy snow-ground interface temperature sensors
Source: Copernicus journal article supplement (doi:10.5194/egusphere-2024-2249), 2024-08-22
Supplement: Supplementary file 1 [file egusphere-2024-2249-supplement.pdf]

## Section S1: Study site

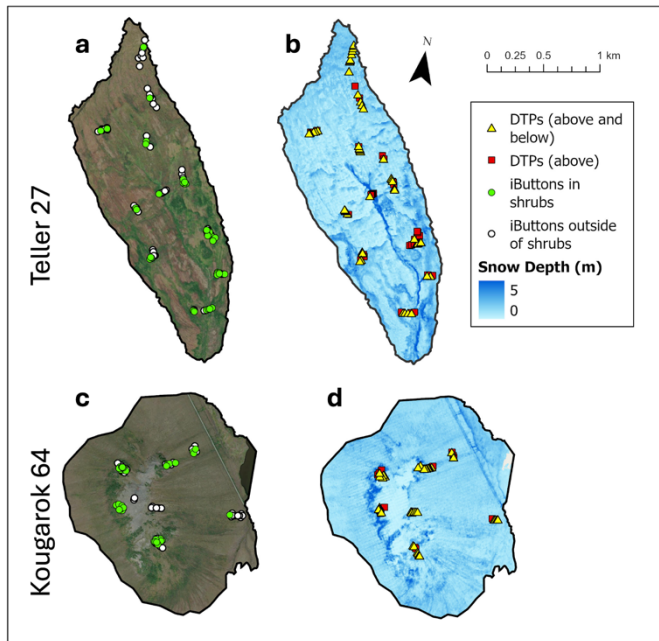

Figure S1. Locations of iButton Link Thermochron (DS1921G-F5#) temperature sensors deployed in (green circles) and outside (white circles) of shrubs over WY2023 at a) Teller27 and c) Kougarok64. Background imagery from Esri, Garmin, USGS, Maxar, 2024, ArcGIS RGB Basemap. Locations of DTP temperature sensors that recorded both *above* and *below* ground temperature (yellow triangles) or only *above* ground temperature (red circles) over WY2022 at b) Teller27 and d) Kougarok64. Blue background imagery shows snow depth in April 2022 estimated using Light Detection and Ranging (LiDAR) data (Singhania et al., 2023b, a).

## Section S2: Model hyperparameters

| Parameter                                                 | Value     |
|-----------------------------------------------------------|-----------|
| Number of decision trees                                  | 70        |
| Maximum depth of decision tree                            | 10 layers |
| Minimum number of samples required to form a yes/no split | 15        |
| Maximum amount of samples used to build a decision tree   | 80%       |
| Maximum number of features used in each decision tree     | 2         |

10

**Table S2. Random forest parameters. To tune hyperparameters, we first visualized how different hyperparameter values affected model performance using the validation dataset. After selecting three candidate values for each hyperparameter, we used a 5-fold cross validation grid search algorithm to determine the best hyperparameter combination.**

## 15 Section S3: Model evaluation sites

| Site                                                | Years       | Sensor Details                                                                                  | Snowpack Bulk Density                                                                             | Source                                                                                                                                                              |
|-----------------------------------------------------|-------------|-------------------------------------------------------------------------------------------------|---------------------------------------------------------------------------------------------------|---------------------------------------------------------------------------------------------------------------------------------------------------------------------|
| Bayelva Station, Svalbard, Norway                   | 2003 - 2017 | 5 cm <i>above</i> the ground surface                                                            | 0.35 g/cm <sup>3</sup>                                                                            | Boike et al., 2018                                                                                                                                                  |
| Senator Beck Basin, CO, USA (2 sites)               | 2003 - 2022 | At snow-ground interface                                                                        | 0.45 g/cm <sup>3</sup> to 0.50 g/cm <sup>3</sup>                                                  | Center for Snow and Avalanche Studies, 2012; Landry et al., 2014                                                                                                    |
| Imnaviat Creek, North Slope, AK, USA                | 1990 - 1992 | At snow-ground interface                                                                        | 0.25 g/cm <sup>3</sup>                                                                            | Stuefer et al., 2020; Sturm and Holmgren, 1994                                                                                                                      |
| Los Alamos, NM, USA (18 iButtons deployed in pairs) | 2023 - 2024 | 9 at the snow-ground interface; 9 1-5 cm <i>below</i> the ground surface                        | 0.4 g/cm <sup>3</sup> during the 2024 water year, according to the nearby Quemazon SNOTEL Station | Temperature sensors were deployed for this study. Snow depth data at site B is from <a href="https://weathermachine.lanl.gov/">https://weathermachine.lanl.gov/</a> |
| SnowEx Grand Mesa Study Plot, CO, USA               | 2017 - 2022 | 5 cm <i>below</i> the ground surface                                                            | 0.4 g/cm <sup>3</sup> , according to the nearby Mesa Lakes SNOTEL Station                         | (Houser et al., 2022)                                                                                                                                               |
| Samoylov Island, Siberia, Russia                    | 2002 - 2020 | 1 cm <i>below</i> the ground surface in low centered polygon; 5.4 cm tall wet tundra vegetation | 0.18 g/cm <sup>3</sup> to 0.23 g/cm <sup>3</sup>                                                  | (Boike et al., 2019)                                                                                                                                                |
| Council, Seward Peninsula, AK, USA (two sites)      | 2000 - 2004 | 0 to 1 cm <i>below</i> the soil surface; tussock and mossy tundra vegetation                    | Unknown                                                                                           | (Hinzman et al., 2016)                                                                                                                                              |
| Ivotuk, North Slope, AK, USA                        | 1998 - 2006 | 0 to 1 cm <i>below</i> the soil surface; tussock sedge and dwarf-shrub tundra                   | Unknown                                                                                           | (Hinzman et al., 2016)                                                                                                                                              |

Table S3. Description of model evaluation sites
